# Supplementary material for: Novel method for determining 234 U- 238 U ages of Devils Hole 2 cavecalcite
Source: Copernicus journal article supplement (doi:10.5194/gchron-2020-26), 2020-08-25
Supplement: Supplementary file [file gchron-2020-26-AC2-supplement.pdf]

Table 1: estimated correlation coefficient with 95% calibrated confidence interval using the method in Olafsdottir and Mudelsee (2014).

| Time range     | Estimated correlation (r) with 95% calibrated confidence interval |                  |             |                |
|----------------|-------------------------------------------------------------------|------------------|-------------|----------------|
|                | d18O-d234Ui                                                       |                  | d13C-d234Ui |                |
| 0-309 ka (66)  | -0.675                                                            | [-0.948; -0.172] | 0.718       | [0.203; 0.922] |
| 0-362 ka (81)  | -0.640                                                            | [-0.904; -0.021] | 0.691       | [0.333; 0.875] |
| 0-590 ka (110) | -0.528                                                            | [-0.810; -0.063] | 0.709       | [0.567; 0.810] |

Table 2: Regression models comparison: the weighted regression methods give about the same fit parameters regardless of the choice of the calibration interval. The regression model without weighting, is somewhat changed, presumably due to the decreased correlation between d234Ui and d18O with more data incorporated from older section (see Table 1). Data with Bold font are the model adopted in the MS.

| Time range (counts)                                                      | Intercept   |                  | $\delta^{18}\text{O}$ |                  | $\delta^{13}\text{C}$ |                  | Residual         | Statistics          |
|--------------------------------------------------------------------------|-------------|------------------|-----------------------|------------------|-----------------------|------------------|------------------|---------------------|
|                                                                          | Value       | 1 $\sigma$ error | Value                 | 1 $\sigma$ error | Value                 | 1 $\sigma$ error | 2 $\sigma$ error | Adj. R <sup>2</sup> |
| Instrumental weighting (factor=1/ $\sigma^2$ ) for 234Ui                 |             |                  |                       |                  |                       |                  |                  |                     |
| 0-309 (66)                                                               | 874         | 192              | -61                   | 10               | 57                    | 17               | 62.4             | 0.65                |
| 0-362 (81)                                                               | 888         | 172              | -61                   | 9.3              | 57                    | 14               | 67.3             | 0.65                |
| 0-590 (110)                                                              | 898         | 147              | -60                   | 8.0              | 58                    | 12               | 78.7             | 0.65                |
| No weighting                                                             |             |                  |                       |                  |                       |                  |                  |                     |
| <b>0-309 (66)</b>                                                        | <b>1219</b> | <b>189</b>       | <b>-44</b>            | <b>10</b>        | <b>86</b>             | <b>16</b>        | <b>60.5</b>      | <b>0.61</b>         |
| 0-362 (81)                                                               | 1411        | 163              | -32                   | 8.7              | 79                    | 16               | 62.8             | 0.54                |
| 0-590 (110)                                                              | 1658        | 151              | -20                   | 8.2              | 108                   | 14               | 70.9             | 0.52                |
| No weighting (calculated with the method in Macias-Fauria et al. (2012)) |             |                  |                       |                  |                       |                  |                  |                     |
| 0-309 (66)                                                               | 1223        |                  | -44                   |                  | 86                    |                  | 60.5             | 0.62                |
| 0-362 (81)                                                               | 1414        |                  | -32                   |                  | 80                    |                  | 62.8             | 0.55                |
| 0-590 (110)                                                              | 1654        |                  | -21                   |                  | 108                   |                  | 70.9             | 0.54                |

Table 3: Coefficient of Determination (R2) , Reduction of Error (RE), Coefficient of Efficiency (CE), and Coefficient of Correlation (r2) with the 95% and 99% threshold values are shown

|       | 4-309 ka (R2=0.624,<br>p=0.0025) |                    | 4-355 ka (R2=0.553,<br>p<0.001) |                    | 4-590 ka (R2=0.536,<br>p<0.001) |                    |
|-------|----------------------------------|--------------------|---------------------------------|--------------------|---------------------------------|--------------------|
|       | Normal                           | Cross<br>Cal./Ver. | Normal                          | Cross<br>Cal./Ver. | Normal                          | Cross<br>Cal./Ver. |
| RE    | 0.235                            | 0.427              | -0.037                          | 0.51               | 0.351                           | 0.561              |
| RE_95 | 0.435                            | 0.325              | 0.248                           | 0.221              | 0.267                           | 0.226              |
| RE_99 | 0.605                            | 0.519              | 0.361                           | 0.361              | 0.396                           | 0.331              |
| CE    | -0.28                            | 0.277              | -0.458                          | 0.417              | 0.294                           | 0.516              |
| CE_95 | 0.194                            | 0.076              | 0.155                           | 0.109              | 0.207                           | 0.165              |
| CE_99 | 0.503                            | 0.341              | 0.322                           | 0.267              | 0.336                           | 0.252              |
| R2    | 0.691                            | 0.685              | 0.701                           | 0.472              | 0.624                           | 0.478              |
| R2_95 | 0.468                            | 0.74               | 0.462                           | 0.52               | 0.368                           | 0.475              |
| R2_99 | 0.588                            | 0.823              | 0.591                           | 0.632              | 0.468                           | 0.611              |
| r2    | 0.358                            | 0.412              | 0.406                           | 0.552              | 0.387                           | 0.525              |
| f2_95 | 0.609                            | 0.353              | 0.39                            | 0.354              | 0.374                           | 0.273              |
| r2_99 | 0.772                            | 0.496              | 0.553                           | 0.461              | 0.531                           | 0.384              |
